# Supplementary material for: Water Consumption during a School Day and Children’s Short-Term Cognitive Performance: The CogniDROP Randomized Intervention Trial
Source: PubMed Central journal article supplement (PMC7282257; doi:10.3390/nu12051297), 2020-05-02
Supplement: nutrients-12-01297-s001.pdf [file nutrients-12-01297-s001.pdf]

## Supplement

**Table 1.** Results of the cognitive tasks by study arm.

|                                  | Intervention |                  |                  | Control   |                  |                  | <i>p</i> Value |
|----------------------------------|--------------|------------------|------------------|-----------|------------------|------------------|----------------|
|                                  | $\bar{x}$    | 25 <sup>th</sup> | 75 <sup>th</sup> | $\bar{x}$ | 25 <sup>th</sup> | 75 <sup>th</sup> |                |
| <b>Switch Task</b>               |              | <i>n</i> = 120   |                  |           | <i>n</i> = 105   |                  |                |
| Switch costs (s)                 | 29.5         | 19.4             | 44.6             | 26.4      | 14.6             | 46.1             | 0.276          |
| Visual search letters (s)        | 36.4         | 31.2             | 45.2             | 34.0      | 30.0             | 41.2             | 0.085          |
| Visual search numbers (s)        | 53.1         | 46.1             | 61.2             | 51.9      | 45.6             | 61.1             | 0.700          |
| Visual search switch (s)         | 93.0         | 76.0             | 115.9            | 86.4      | 70.3             | 103.8            | 0.109          |
| <b>Corsi Block</b>               |              | <i>n</i> = 136   |                  |           | <i>n</i> = 114   |                  |                |
| Longest Path (n)                 | 5.0          | 4.0              | 6.0              | 5.0       | 4.3              | 6.0              | 0.734          |
| Correct immediate block span (n) | 6.0          | 4.0              | 8.0              | 6.0       | 4.0              | 8.0              | 0.671          |
| Score                            | 10.5         | 7.0              | 16.3             | 11.5      | 7.0              | 15.0             | 0.849          |
| <b>2-back</b>                    |              | <i>n</i> = 135   |                  |           | <i>n</i> = 113   |                  |                |
| Ratio of missings (%)            | 33.3         | 19.0             | 42.9             | 33.3      | 23.8             | 47.6             | 0.491          |
| Ratio of false alarms (%)        | 11.2         | 7.1              | 25.9             | 12.9      | 7.1              | 23.5             | 0.328          |
| RT (ms) <sup>a</sup>             | 466          | 403              | 550              | 465       | 382              | 551              | 0.601          |
| Count of correct events (n)      | 88.5         | 76.0             | 94.0             | 86.0      | 77.0             | 92.0             | 0.349          |
| <b>Flanker Task</b>              |              | <i>n</i> = 107   |                  |           | <i>n</i> = 82    |                  |                |
| RT slowing (ms)                  | 79.7         | 56.5             | 98.8             | 72.6      | 51.9             | 100.0            | 0.532          |
| Difference error rate (%)        | 17.1         | 8.6              | 28.6             | 17.1      | 10.7             | 28.6             | 0.648          |
| Count of false alarms (n)        | 8.0          | 3.0              | 15.0             | 7.0       | 3.0              | 19.0             | 0.378          |

Mann–Whitney *U*-test, <sup>a</sup>*t*-test, data are presented as  $\bar{x}$  = Median, 25th and 75th percentiles, level of significance was set to  $p \leq 0.05$ .

**Table 2.** Results of the switch and flanker task including all participants.

|                       | Study Arm <sup>a</sup>            |                              | Categorie <sup>b</sup> |          |
|-----------------------|-----------------------------------|------------------------------|------------------------|----------|
|                       | Intervention<br>( <i>n</i> = 136) | Control<br>( <i>n</i> = 114) | Water<br>in mL         | % of TWI |
| <b>Switch Task</b>    |                                   |                              |                        |          |
| Switch costs          |                                   | 0.613                        | 0.176                  | 0.618    |
| Visual search letters |                                   | 0.534                        | 0.311                  | 0.908    |
| Visual search numbers |                                   | 0.896                        | 0.590                  | 0.924    |
| Visual search switch  |                                   | 0.200                        | 0.540                  | 0.522    |
| <b>Flanker Task</b>   |                                   |                              |                        |          |
| RT slowing (ms)       |                                   | 0.403                        | 0.909                  | 0.802    |
| Difference error rate |                                   | 0.223                        | 0.573                  | 0.494    |
| Count of false alarms |                                   | 0.720                        | 0.134                  | 0.155    |

<sup>a</sup>Mann-Whitney U test; <sup>b</sup>Kruskal-Wallis test; data are presented as a *p* value;  $p \leq 0.05$ ; TWI = total water intake.

**Table 3.** Relationship between urine color, thirst and cognitive performance.

|                                        | Thirst <sup>a</sup> |               |                |
|----------------------------------------|---------------------|---------------|----------------|
|                                        | Ucol <sup>b</sup>   | yes           | no             |
| <b>Switch task</b>                     | <i>n</i> = 223      | <i>n</i> = 81 | <i>n</i> = 142 |
| Switch costs (s) <sup>b</sup>          | 0.917               |               | 0.205          |
| Visual search letters (s) <sup>c</sup> | 0.583               |               | 0.029          |
| Visual search numbers (s)              | 0.909               |               | 0.171          |
| Visual search switch (s)               | 0.822               |               | 0.017          |
| <b>Corsi block-tapping task</b>        | <i>n</i> = 248      | <i>n</i> = 88 | <i>n</i> = 160 |
| Longest Path (n)                       | 0.816               |               | 0.647          |
| Correct immediate block span (n)       | 0.956               |               | 0.480          |
| Score                                  | 0.966               |               | 0.409          |
| <b>2-back task</b>                     | <i>n</i> = 246      | <i>n</i> = 87 | <i>n</i> = 159 |
| Ratio of missings (%)                  | 0.530               |               | 0.437          |
| Ratio of false alarms (%)              | 0.413               |               | 0.154          |
| RT (ms)                                | 0.884               |               | 0.173          |
| Count of correct events (n)            | 0.323               |               | 0.225          |
| <b>Flanker task</b>                    | <i>n</i> = 189      | <i>n</i> = 73 | <i>n</i> = 115 |
| RT slowing (ms)                        | 0.069               |               | 0.817          |
| Difference error rate (%)              | 0.685               |               | 0.738          |
| Count of false alarms (n)              | 0.925               |               | 0.853          |

<sup>a</sup>Mann–Whitney U-test, <sup>b</sup> Spearman's correlation, level of significance was set to  $p \leq 0.05$ .
